# Supplementary material
Source: Springer Nature journal article supplement (https://www.springermedizin.de/resource/supplementary/13058_2012_3184_MOESM3_ESM.pdf/9703456)

**A**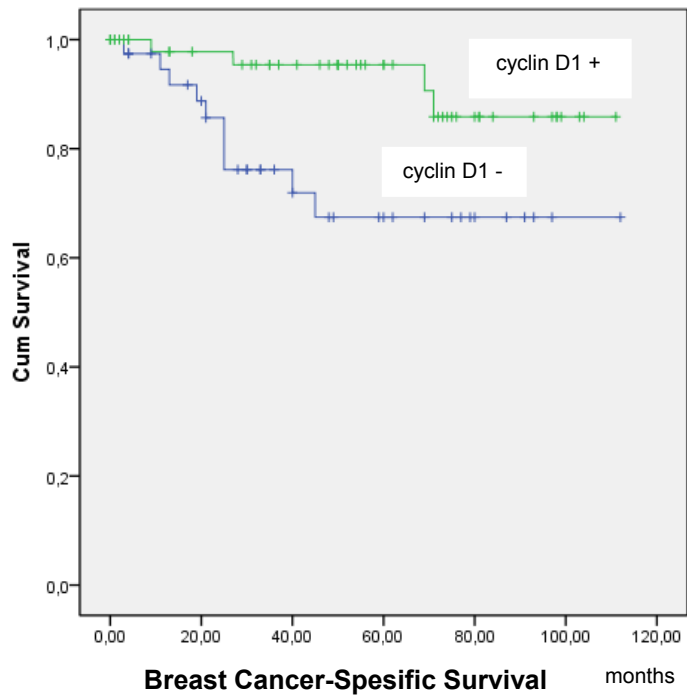**B**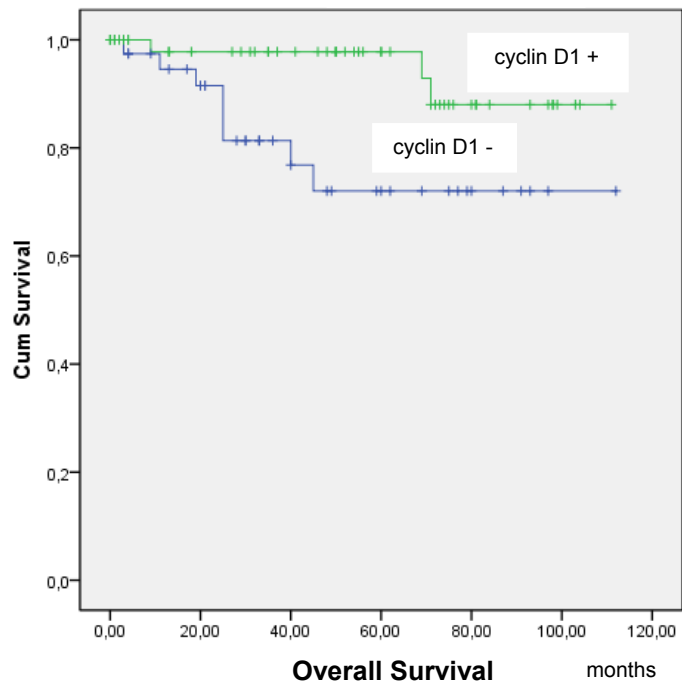

Supplement: MOESM3 [file 9703456]
